# Supplementary material for: BaZFP1, a C2H2 Subfamily Gene in Desiccation-Tolerant Moss Bryum argenteum, Positively Regulates Growth and Development in Arabidopsis and Mosses
Source: MDPI journal article supplement (doi:10.3390/ijms232112894), 2022-10-25
Supplement: s1 [file s1]

Table S3 Primers for *Arabidopsis* real-time RT-PCR

| Gene name               | Annotation                                        | Primers (5'to3')                                     |
|-------------------------|---------------------------------------------------|------------------------------------------------------|
| AtHLS1<br>(AT4G37580)   | HOOKLESS 1                                        | F: CTCTCGCTTGGGACTTTCGT<br>R: CAATCTCGACGCTCCACGTA   |
| AtSAUR17<br>(AT4G09530) | SMALL AUXIN<br>UPREGULATED RNA 17                 | F: TAACTATGCCGCACAAGGTCA<br>R: ACGTAAACGACGAAATGCCC  |
| AtEIN3<br>(AT3G20770)   | Ethylene insensitive 3                            | F: AAAGTCGGCGTTTTGACTGC<br>R: AGGTGGACATGACTCGGGAT   |
| AtHY5<br>(AT5G11260)    | ELONGATED HYPOCOTYL 5                             | F: TGTAATCCCAAGTCCCGCT<br>R: TTGATGACCTCTCGCTGCTT    |
| AtGAI<br>(AT1G14920)    | GIBBERELLIC ACID<br>INSENSITIVE                   | F: CACGCCACAACCTACAGGCTA<br>R: TGTGCCAACCCAAACATGAGA |
| AtPIF4<br>(AT2G43010)   | Phytochrome interacting factor 4                  | F: GACCGTTGGACCTAGCCATT<br>R: TGAGGAACTTGCGTTCGGAT   |
| AtANT<br>(AT4G37750)    | AINTEGUMENTA                                      | F: CTAGCTGCATCACTGGCTCT<br>R: TTGTCGTCGTCTCAAACCCA   |
| AtAN3<br>(AT5G28640)    | ANGUSTIFOLIA 3                                    | F: CGAATGCGCCGAGAATCAAG<br>R: AATCATCCCACCACCAGCAG   |
| AtGRF3<br>(AT2G36400)   | Growth-regulating factor 3                        | F: TGACGATTGGCCTCGTTCTT<br>R: CTCCCATTGTTGTTGCTCCG   |
| AtFT<br>(At1g65480)     | FLOWERING LOCUS T                                 | F: TCTACAATCTCGGCCTTCCC<br>R: ATAGGCATCATCACCGTTCGT  |
| AtLFY<br>(AT5G61850)    | Floral meristem identity control<br>protein LEAFY | F: ATGGATAACGGCAACGGAGG<br>R: GCATTTTTCGCCACGGTCTT   |
| AtFLC<br>AT5G10140)     | FLOWERING LOCUS C                                 | F: GGCGACTTGAACCCAAACCT<br>R: GTTGCGACGTTTGAGAAGG    |
| AtTUA6<br>(AT4G14960)   | Tubulin alpha-6                                   | F: ACCCATCTCCACAGGTGTCT<br>R: CCTGAGAGACGAGACGGTTG   |
| AtUBQ12<br>(AT1G55060)  | Ubiquitin 12                                      | F: TTGACGGGAAAGACCATCACG<br>R: AATCCGCTAAAGTGCGACC   |
