# Supplementary material for: BaZFP1, a C2H2 Subfamily Gene in Desiccation-Tolerant Moss Bryum argenteum, Positively Regulates Growth and Development in Arabidopsis and Mosses
Source: MDPI journal article supplement (doi:10.3390/ijms232112894), 2022-10-25
Supplement: s1 [file s1]

Table S4 Primers for *Bryum argenteum* and *Physcomitrella patens* real-time RT-PCR

| Gene name                  | Annotation                                 | Primers (5'to3')                                           |
|----------------------------|--------------------------------------------|------------------------------------------------------------|
| PpDCL4<br>(EF670438.1)     | Physcomitrella patens dicer-like<br>4 mRNA | F: TTGCTGCCAGGGTGGATAAG<br>R: ACACTGCTCCTGCTAACGAC         |
| PpAPB4<br>(AB675592)       | AINTEGUMENTA,<br>PLETHORA and BABY BOOM    | F: TCTCATCCTTGTTCCGGTGC<br>R: ATCCCAGCTTTCCGTGTCTG         |
| PpSEC6<br>(Pp3c8_3920V3.1) | Core exocyst subunit                       | F: GCTGTTGCCTCTCCCTGATT<br>R: AGCCCTAGCTTGCTCTACCT         |
| PpSTM1<br>(Pp3c1_27440: L) | STEM CELL-INDUCING<br>FACTOR 1             | F: ATACCGAGGAGTGCGACAAC<br>R: TCGTAGGGGAAATTGGTGCG         |
| BaDCL4                     | Physcomitrella patens dicer-like<br>4 mRNA | F: CAACTGCTCCACATTGCTCG<br>R: GCAACAGCACAAACACGACAT        |
| BaAPB4                     | AINTEGUMENTA,<br>PLETHORA and BABY BOOM    | F: CACGCCACAACACTACAGGCTA<br>R: CACAACCTCTTTCCGCCTGC       |
| BaSEC6                     | Core exocyst subunit                       | F: ACTACGAGACGACATCCCCA<br>R: TTTCGGGAGGCAAGTGAGTC         |
| BaSTM1                     | STEM CELL-INDUCING<br>FACTOR 1             | F: CCGTGCTTCGAGTGGTTTTG<br>R: TCAGAAACCTCCGCCATTCC         |
| Pp-Actin                   | -----                                      | F: CGGAGAGGAAGTACAGTGTGTGGA<br>R: CTGGGCTCAATTCTAACGGCTGGT |
| Ba-Tublin                  | -----                                      | F: ATCACGGAGTTCCAGACCAA<br>R: CCACTGCCGCATTCACAT           |
