# Supplementary material for: BaZFP1, a C2H2 Subfamily Gene in Desiccation-Tolerant Moss Bryum argenteum, Positively Regulates Growth and Development in Arabidopsis and Mosses
Source: MDPI journal article supplement (doi:10.3390/ijms232112894), 2022-10-25
Supplement: s1 [file s1]

Table S2 List of primers used for plant overexpression vector  
construction

| Primer name                   | Primers (5'to3')                                                                                       |
|-------------------------------|--------------------------------------------------------------------------------------------------------|
| BaZFP1                        | F: ATGGAAC TCTTTCTTTTGGC<br>R: CGATTGAGCAAATAG                                                         |
| pROKII                        | F: CAGGAAACAGCTATGAC<br>R: TGACCGGCAGCAAATG                                                            |
| pROKII- BaZFP1 (Infusion)     | F: <u>CTCTAGAGGATCCCCGGG</u> ATGGAAC TCTTTCTTTTGGC<br>R: <u>TCGAGCTCGGTACCCGGG</u> CGATTGAGCAAATAG     |
| PBI121- BaZFP1-GFP (Infusion) | F: <u>CAAGGGTCTAGACCC</u> ATGGAAC TCTTTCTTTTGGC<br>R: <u>TGGTGATGCATTCCCTTA</u> ATTGAGCAAATAGTTGAGTTCC |
| PBI121-GFP                    | F: GTCATAGCTGTTTCCTG<br>R: ACTGGCCGTCGTTTTAC                                                           |
